# Supplementary material for: Limited physical protection leads to high organic carbon reactivity in anoxic Baltic Sea sediments
Source: Copernicus journal article supplement (doi:10.5194/bg-22-8065-2025), 2025-12-19
Supplement: Supplementary file 1 [file bg-22-8065-2025-supplement.pdf]

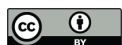

*Supplement of*

## **Limited physical protection leads to high organic carbon reactivity in anoxic Baltic Sea sediments**

**Silvia Placitu et al.**

*Correspondence to:* Silvia Placitu ([silviaplacitu@ulb.be](mailto:silviaplacitu@ulb.be))

The copyright of individual parts of the supplement might differ from the article licence.

**Limited Physical Protection Leads To High Organic Carbon Reactivity in Anoxic Baltic Sea Sediments**

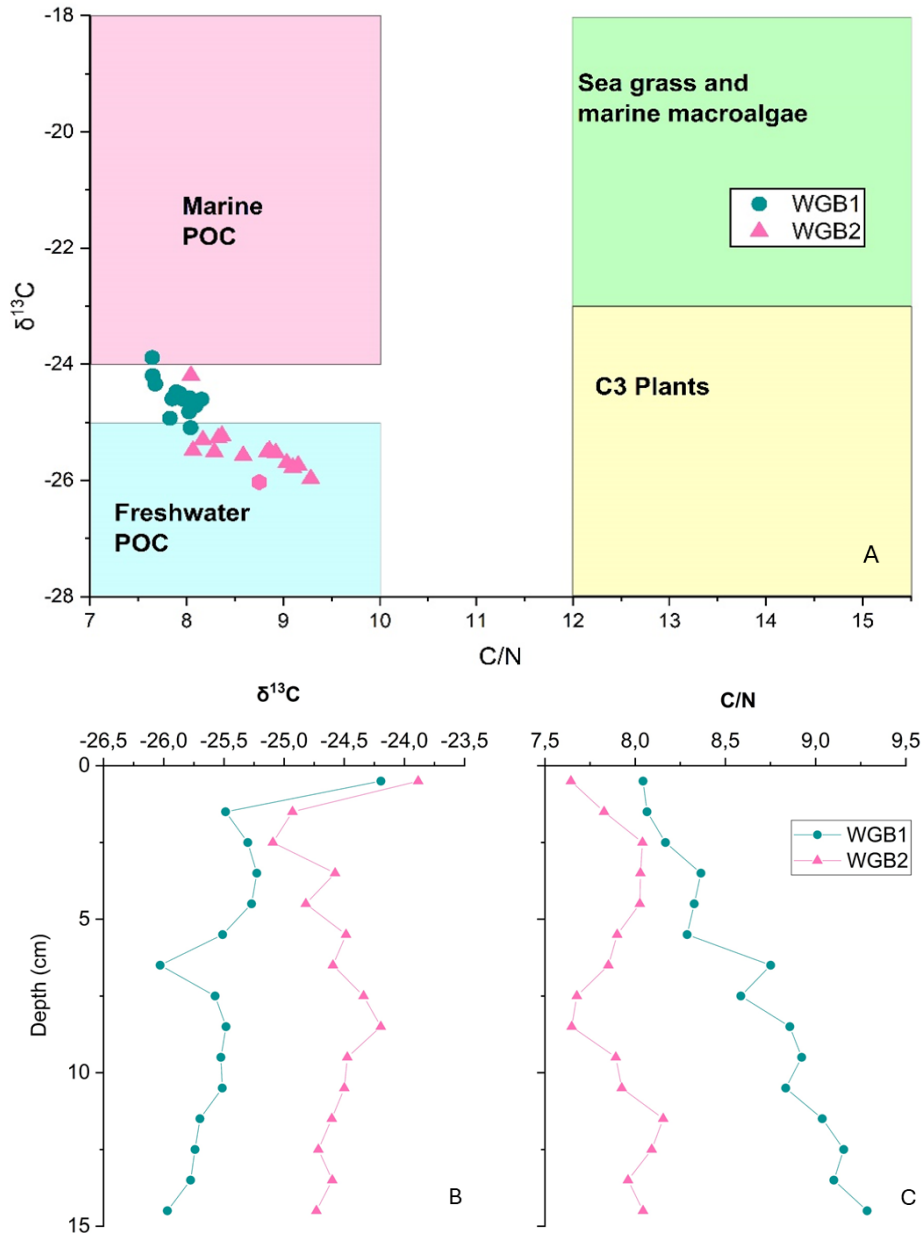

**Figure S1: A)  $\delta^{13}\text{C}$  and C/N ranges for organic inputs to coastal environment (data compiled from Lamb et al., 2006 and Khan et al., 2015), and WGB1 and WGB2 organic matter signature. B)  $\delta^{13}\text{C}$  and C) C/N downcore profiles.**

5

**Table S1: Steps for OC-Fe extractions. On the left the citrate bicarbonate dithionite extraction (CBD) and on the right the control extraction**

|        | Citrate bicarbonate dithionite extraction                                                                                                              | Control extraction                                                                                        |
|--------|--------------------------------------------------------------------------------------------------------------------------------------------------------|-----------------------------------------------------------------------------------------------------------|
| Step 1 | 250 mg of sample + 15 mL of 0.27 M $\text{Na}_3\text{C}_6\text{H}_5\text{O}_7\cdot\text{H}_2\text{O}$ and 0.11 M $\text{NaHCO}_3$ (water bath at 80°C) | 250 mg of sample + 15 mL of 1.6 M $\text{NaCl}$ and 0.11 M $\text{NaHCO}_3$ (water bath at 80°C)          |
| Step 2 | + 250 mg $\text{Na}_2\text{S}_2\text{O}_4$ , 15 minutes at 80°C<br>Centrifuge and collect supernatant                                                  | + 220 mg $\text{NaCl}$ , 15 minutes at 80°C<br>Centrifuge and collect supernatant                         |
| Step 3 | +10 mL ASW x3<br>Centrifuge and collect supernatant                                                                                                    | +10 mL ASW x3<br>Centrifuge and collect supernatant                                                       |
|        | The solutions were mixed all together (45 ml total) and acidified with 100 $\mu\text{L}$ $\text{HCl}$ 32%                                              | The solutions were mixed all together (45 ml total) and acidified with 100 $\mu\text{L}$ $\text{HCl}$ 32% |

10

15
